# Supplementary material for: Effectiveness of Emotional Memory Reactivation vs Control Memory Reactivation Before Electroconvulsive Therapy in Adult Patients With Depressive Disorder: A Randomized Clinical Trial
Source: PubMed Central journal article supplement (PMC7403919; doi:10.1001/jamanetworkopen.2020.12389), 2020-08-04
Supplement: jamanetwopen-3-e2012389-s002.pdf [file jamanetwopen-3-e2012389-s002.pdf]

## Data Sharing Statement

Scheepens. Effectiveness of Emotional Memory Reactivation vs Control Memory Reactivation Before Electroconvulsive Therapy in Adult Patients With Depressive Disorder. *JAMA Netw Open*. Published August 04, 2020. 10.1001/jamanetworkopen.2020.12389

### Data

**Data available:** Yes

**Data types:** Participant data with identifiers

**How to access data:** [g.a.vanwingen@amsterdamumc.nl](mailto:g.a.vanwingen@amsterdamumc.nl)

**When available:** With publication

### Supporting Documents

**Document types:** None

### Additional Information

**Who can access the data:** researchers whose proposed use of the data has been approved

**Types of analyses:** for a specific purpose

**Mechanisms of data availability:** after approval of a proposal

**Any additional restrictions:** none
